# Supplementary material
Source: publisher figshare collection journal article supplement (https://karger.figshare.com/ndownloader/files/17708423)
Supplement: Supplementary file 1 [file 17708423]

**Table S2. Odds of fetal fraction ≥4% according to gestational age and maternal body mass index.**

**
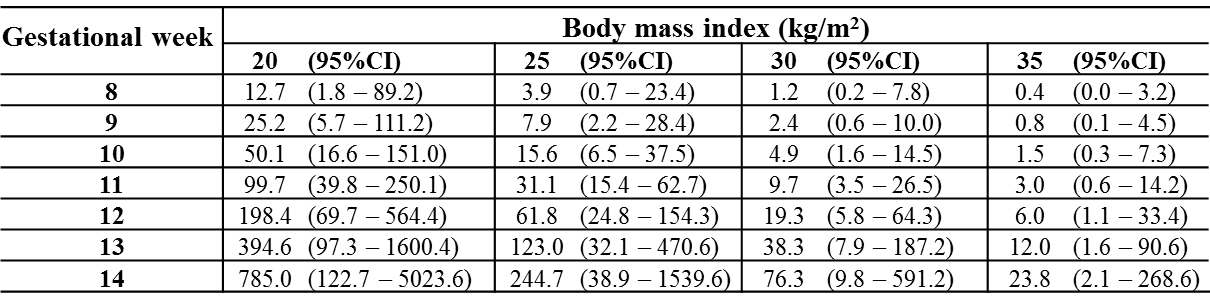
**

The table is based on samples collected from euploid pregnancies (n=542 samples).
